# Supplementary material for: Polyp expansion of passive suspension feeders: a red coral case study
Source: PeerJ. 2019 Jul 9;7:e7076. doi: 10.7717/peerj.7076 (PMC6625502; doi:10.7717/peerj.7076)
Supplement: Supplemental Information 5 — Data of the (1) field observations (seston and zooplankton) and (2) experiment variables (temperature, currents & chemical signals) [file peerj-07-7076-s005.xlsx]

## Sheet: Seston
	Carbon tot<100um(ug/l)	Carbon tot<10um(ug/l)	Nitrogen <100um(ug/l)	Nitrogen<10um(ug/l)	Chlorophyll a<100um(ug/l)	Chlorophyll a<10um(ug/l)	Proteins<100um(ug/l)		Cycle	Time
C1T3a	159.9	115	11.9	13	0.288	0.348	161		C1	T3
C1T3b	176.4	106	13.2	13	0.355	0.325	150		C1	T3
C1T3c	176.4	107	13.8	13	0.338	0.379	156		C1	T3
C1T4a	393.9	18	30	3	0.39	0.27	145		C1	T4
C1T4b	410.4	24	38	3	0.348	0.286	113		C1	T4
C1T4c	279.9	24	26.2	2	0.355	0.234	135		C1	T4
C1T1a	222.9	89	15.5	10	0.496	0.335	150		C1	T1
C1T1b	176.4	85	13	11	0.465	0.318	145		C1	T1
C1T1c	159.9	81	12.7	10	0.434	0.366	161		C1	T1
C1T2a	219.9	55	15.1	11	0.769	0.475	137		C1	T2
C1T2b	195.9	58	13	10	0.687	0.42	143		C1	T2
C1T2c	228.9	115	14.6	14	0.581	0.468	138		C1	T2
C2T3a	171.9	103	12.8	11	0.5	0.41	176		C2	T3
C2T3b	251.4	102	13.6	11	0.521	0.42	168		C2	T3
C2T3c	176.4	101	13.6	11	0.513	0.427	157		C2	T3
C2T4a	188.4	99	14	12	0.42	0.403	193		C2	T4
C2T4b	171.9	108	14.1	12	0.485	0.366	196		C2	T4
C2T4c	159.9	97	15.1	12	0.506	0.281	205		C2	T4
C2T1a	185.4	84	15.1	17	0.485	0.434	168		C2	T1
C2T1b	168.9	107	13.4	15	0.496	0.431	162		C2	T1
C2T1c	182.4	95.5	15.1	16	0.492	0.427	134		C2	T1
C2T2a	176.4	88	15.7	20	0.386	0.455	164		C2	T2
C2T2b	176.4	121	14.2	17	0.41	0.437	162		C2	T2
C2T2c	176.4	104.5	14.95	18.5	0.519	0.379	168		C2	T2
C3T3a	210.9	124	21.2	17	0.368	0.295	167		C3	T3
C3T3b	315.9	101	20.3	14	0.567	0.297	205		C3	T3
C3T3c	180.9	95	21.2	14	0.444	0.291	168		C3	T3
C3T4a	371.4	90	57.8	13	0.282	0.268	243		C3	T4
C3T4b	341.4	132	60.6	17	0.409	0.256	206		C3	T4
C3T4c	308.4	135	32.5	18	0.358	0.282	245		C3	T4
C3T2a	356.4	153	32.2	22	0.321	0.352	207		C3	T2
C3T2b	278.4	112	32.2	16	0.345	0.304	200		C3	T2
C3T2c	332.4	132.5	32.2	19	0.331	0.328	176		C3	T2
C4T3a	200.4	91	16.1	12	0.407	0.311	206		C4	T3
C4T3b	177.9	89	32.5	12	0.342	0.264	193		C4	T3
C4T3c	206.4	79	33.9	10	0.286	0.335	205		C4	T3
C4T4a	555.9	127	67	18	0.361	0.234	218		C4	T4
C4T4b	474.9	116	58.7	16	0.338	0.3	214		C4	T4
C4T4c	276.9	113	27.8	16	0.372	0.279	209		C4	T4
C4T1a	261.9	77	20.2	10	0.423	0.239	135		C4	T1
C4T1b	249.9	90	20.2	13	0.314	0.22	127		C4	T1
C4T1c	243.9	86	20.1	10	0.348	0.301	155		C4	T1
C4T2a	326.4	156	25.5	19	0.426	0.448	215		C4	T2
C4T2b	405.9	159	27.8	57	0.348	0.403	244		C4	T2
C4T2c	386.4	146	30.9	17	0.348	0.348	242		C4	T2
C5T3a	309.9	126	25.3	15	0.389	0.461	223		C5	T3
C5T3b	353.4	141	27.6	15	0.406	0.492	174		C5	T3
C5T3c	323.4	140	26.8	17	0.444	0.513	244		C5	T3
C5T4a	264.9	96	22.4	21	0.293	0.448	174		C5	T4
C5T4b	257.4	98	24	21	0.375	0.431	174		C5	T4
C5T4c	249.9	117	23	18	0.361	0.533	203		C5	T4
C5T1a	287.4	101	26.8	13	0.348	0.355	175		C5	T1
C5T1b	279.9	111	28.7	17	0.365	0.342	190		C5	T1
C5T1c	326.4	95	32.1	12	0.355	0.338	190		C5	T1
C5T2a	348.9	147	30.3	20	0.266	0.355	137		C5	T2
C5T2b	314.4	134	25.3	33	0.334	0.431	152		C5	T2
C5T2c	303.9	133	24.3	34	0.289	0.311	133		C5	T2

## Sheet: PolypExp
	Open (mean of 10 colonies)	Semi (mean of 10 colonies)	Closed (mean of 10 colonies)		Cycle	Time
C1T3a	5.5	3.5	1		C1	T3
C1T3b	7.5	1.5	1		C1	T3
C1T3c	4.5	0.5	5		C1	T3
C1T4a	0	0	10		C1	T4
C1T4b	0	0	10		C1	T4
C1T4c	0	0	10		C1	T4
C1T1a	9.66667	0	0.333333		C1	T1
C1T1b	9.66667	0.333333	0		C1	T1
C1T1c	9.5	0.25	0.25		C1	T1
C1T2a	0.666667	7	2.33333		C1	T2
C1T2b	0	9.33333	0.666667		C1	T2
C1T2c	3.5	5.5	1		C1	T2
C2T3a	1.5	2.5	6		C2	T3
C2T3b	5	4.33333	0.666667		C2	T3
C2T3c	5	2.5	2.5		C2	T3
C2T4a	4.66667	0	5.33333		C2	T4
C2T4b	0.333333	0	9.66667		C2	T4
C2T4c	5.25	0.75	4		C2	T4
C2T1a	2.66667	0.333333	7		C2	T1
C2T1b	3.33333	0	6.66667		C2	T1
C2T1c	1.25	1	7.75		C2	T1
C2T2a	0	8.33333	1.66667		C2	T2
C2T2b	0	9	1		C2	T2
C2T2c	0	7.5	2.5		C2	T2
C3T3a	10	0	0		C3	T3
C3T3b	9.66667	0.333333	0		C3	T3
C3T3c	9.75	0.25	0		C3	T3
C3T4a	7	1	2		C3	T4
C3T4b	7.33333	1	1.66667		C3	T4
C3T4c	8.25	1	0.75		C3	T4
C3T2a	3	5	2		C3	T2
C3T2b	3.5	4	2.5		C3	T2
C3T2c	8	1	1		C3	T2
C4T3a	10	0	0		C4	T3
C4T3b	9.66667	0.333333	0		C4	T3
C4T3c	10	0	0		C4	T3
C4T4a	10	0	0		C4	T4
C4T4b	10	0	0		C4	T4
C4T4c	10	0	0		C4	T4
C4T1a	6.33333	0	3.66667		C4	T1
C4T1b	9.66667	0.333333	0		C4	T1
C4T1c	8.5	0.5	1		C4	T1
C4T2a	3	5.66667	1.33333		C4	T2
C4T2b	2.66667	3.33333	4		C4	T2
C4T2c	0	6.66667	3.33333		C4	T2
C5T3a	5	1	4		C5	T3
C5T3b	3.66667	2.66667	3.66667		C5	T3
C5T3c	3.5	2	4.5		C5	T3
C5T4a	10	0	0		C5	T4
C5T4b	9.66667	0.333333	0		C5	T4
C5T4c	10	0	0		C5	T4
C5T1a	10	0	0		C5	T1
C5T1b	10	0	0		C5	T1
C5T1c	10	0	0		C5	T1
C5T2a	0.333333	0.333333	9.33333		C5	T2
C5T2b	4	2.66667	3.33333		C5	T2
C5T2c	5	0	5		C5	T2

## Sheet: Zooplankton
ind/m3	invertebrate EGGS	NAUPLII	HARPACTICOIDA	CYCLOPOIDA	CALANOIDA	APENDICULARIA	LAMELLIBRANCHIA	GASTROPODA	OSTRACODA	POLICHAETA	SYPHONOPHORA	AMPHIPODA	ECHINODERMATA	ISOPODA	SALPAE	MEDUSAE	CLADOCERA	TINTINIDA	PROTOZOA	MISIDIACEA	L.MISIS-ZOE	L.INVERTEBR.	OTHER GROUPS	CRUSTACEA		Cycle	Time
C1T3	4	117.333	233.333	184	46.6667	36	4	0	9.33333	2.66667	5.33333	0	4	1.33333	8	0	8	34.6667	14.6667	0	0	5.33333	2.66667	0		C1	T3
C1T4	7.91667	61.75	251.75	323	25.3333	11.0833	1.58333	4.75	3.16667	3.16667	0	3.16667	1.58333	0	1.58333	1.58333	6.33333	4.75	0	4.75	0	1.58333	1.58333	17.4167		C1	T4
C1T1	14.6667	76	34.6667	257.333	124	45.3333	0	0	0	2.66667	2.66667	0	4	0	6.66667	0	5.33333	2.66667	0	1.33333	0	0	1.33333	0		C1	T1
C1T2	48.8767	219.501	120.859	394.568	85.312	49.7653	4.44333	5.332	3.55467	8.88667	7.10933	1.77733	7.998	0	3.55467	0	5.332	7.10933	0	0	1.77733	7.998	1.77733	0.888667		C1	T2
C2T3	34	198	188	266	70	28	2	6	4	8	0	0	4	0	0	0	2	6	0	0	0	0	2	8		C2	T3
C2T4	18	114	58	288	126	12	10	6	2	6	0	0	2	0	4	2	16	10	0	0	0	6	0	4		C2	T4
C2T1	18.6667	76	89.3333	225.333	97.3333	52	4	1.33333	5.33333	20	5.33333	1.33333	4	0	4	0	9.33333	1.33333	0	0	0	5.33333	1.33333	5.33333		C2	T1
C2T2	22.6667	148	93.3333	94.6667	74.6667	42.6667	2.66667	5.33333	5.33333	6.66667	1.33333	0	5.33333	1.33333	1.33333	0	5.33333	5.33333	0	0	5.33333	8	2.66667	1.33333		C2	T2
C3T3	28	484	80	1140	348	110	20	14	10	32	18	0	0	0	46	6	22	74	0	0	0	8	0	10		C3	T3
C3T4	8	154	120	614	266	82	0	2	0	24	4	0	10	0	24	10	30	6	0	0	0	8	2	0		C3	T4
C3T2	12	332	156	928	504	124	4	4	0	16	8	0	12	0	36	8	44	12	0	0	4	16	0	12		C3	T2
C4T3	40	253.333	128	346.667	277.333	56	18.6667	10.6667	5.33333	13.3333	10.6667	0	5.33333	0	32	0	21.3333	53.3333	13.3333	0	2.66667	5.33333	2.66667	5.33333		C4	T3
C4T4	11.726	104.468	113.707	488.939	203.961	119.392	7.10667	8.17267	3.55333	12.792	4.61933	0	6.396	0	119.747	27.1119	51.5233	49.036	18.8327	0	14.2133	7.10667	3.55333	0		C4	T4
C4T1	26.6667	122.667	72	461.333	205.333	112	10.6667	16	5.33333	18.6667	16	0	0	0	133.333	29.3333	72	149.333	5.33333	61.3333	13.3333	2.66667	16	114.667		C4	T1
C4T2	26.6667	821.333	48	5989.33	736	261.333	5.33333	16	5.33333	32	32	0	21.3333	0	170.667	16	74.6667	144	26.6667	0	5.33333	5.33333	0	0		C4	T2
C5T3	8	410.667	64	1957.33	309.333	144	24	34.6667	8	29.3333	8	0	2.66667	0	32	2.66667	16	48	18.6667	2.66667	0	2.66667	0	5.33333		C5	T3
C5T4	53.3333	1040	186.667	3666.67	1693.33	320	66.6667	0	40	40	66.6667	0	0	0	200	106.667	426.667	120	26.6667	0	13.3333	106.667	0	0		C5	T4
C5T1	43.632	593.88	46.056	2647.01	1173.22	281.184	21.816	14.544	0	36.36	29.088	0	4.848	0	237.552	16.968	123.624	82.416	31.512	7.272	9.696	26.664	0	0		C5	T1
C5T2	13.3333	190.667	193.333	209.333	69.3333	24	4	2.66667	5.33333	52	9.33333	0	24	1.33333	13.3333	1.33333	2.66667	17.3333	48	0	0	12	6.66667	0		C5	T2

## Sheet: Temp_Curr
	Full opening Intervals (min)		Temp	Curr
T1C1a	639.556		T1	C1
T1C1b	603.37		T1	C1
T1C1c	703.511		T1	C1
T1C1d	545.932		T1	C1
T1C1e	427.758		T1	C1
T1C1f	781.533		T1	C1
T1C1g	383.296		T1	C1
T1C1h	719.833		T1	C1
T1C1i	414.72		T1	C1
T1C1j	304.376		T1	C1
T1C1k	454.136		T1	C1
T1C1l	735.489		T1	C1
T2C1a	377.682		T2	C1
T2C1b	510.042		T2	C1
T2C1c	433.958		T2	C1
T2C1d	178.914		T2	C1
T2C1e	183.027		T2	C1
T2C1f	193.97		T2	C1
T2C1g	295.037		T2	C1
T2C1h	540.04		T2	C1
T2C1i	443.862		T2	C1
T2C1j	306.436		T2	C1
T2C1k	188.499		T2	C1
T2C1l	417.539		T2	C1
T3C1a	435.486		T3	C1
T3C1b	531.533		T3	C1
T3C1c	1241.81		T3	C1
T3C1d	1373.56		T3	C1
T3C1e	797.354		T3	C1
T3C1f	863.8		T3	C1
T3C1g	309.26		T3	C1
T3C1h	560.208		T3	C1
T3C1i	483.509		T3	C1
T3C1j	1307.68		T3	C1
T3C1k	830.577		T3	C1
T3C1l	434.734		T3	C1
T1C2a	179		T1	C2
T1C2b	179		T1	C2
T1C2c	191.2		T1	C2
T1C2d	159.333		T1	C2
T1C2e	191.2		T1	C2
T1C2f	191.2		T1	C2
T1C2g	82.1714		T1	C2
T1C2h	159.778		T1	C2
T1C2i	159.778		T1	C2
T1C2j	173.093		T1	C2
T1C2k	53.1111		T1	C2
T1C2l	139.587		T1	C2
T2C2a	95.6		T2	C2
T2C2b	464.324		T2	C2
T2C2c	106.361		T2	C2
T2C2d	455.55		T2	C2
T2C2e	95.6		T2	C2
T2C2f	464.324		T2	C2
T2C2g	106.361		T2	C2
T2C2h	455.55		T2	C2
T2C2i	95.6		T2	C2
T2C2j	464.324		T2	C2
T2C2k	106.361		T2	C2
T2C2l	455.55		T2	C2
T3C2a	410.495		T3	C2
T3C2b	324.467		T3	C2
T3C2c	325.017		T3	C2
T3C2d	299		T3	C2
T3C2e	239.2		T3	C2
T3C2f	299		T3	C2
T3C2g	299		T3	C2
T3C2h	398.24		T3	C2
T3C2i	503.533		T3	C2
T3C2j	473.246		T3	C2
T3C2k	209.3		T3	C2
T3C2l	131.163		T3	C2
T1C0a	361.943		T1	C0
T1C0b	541.504		T1	C0
T1C0c	344.323		T1	C0
T1C0d	439.477		T1	C0
T1C0e	343.841		T1	C0
T1C0f	287.083		T1	C0
T1C0g	355.22		T1	C0
T1C0h	503.767		T1	C0
T1C0i	710.437		T1	C0
T1C0j	1045.4		T1	C0
T1C0k	1069.91		T1	C0
T1C0l	1170.8		T1	C0
T2C0a	312.226		T2	C0
T2C0b	638.398		T2	C0
T2C0c	482.631		T2	C0
T2C0d	623.856		T2	C0
T2C0e	788.38		T2	C0
T2C0f	295.231		T2	C0
T2C0g	340.693		T2	C0
T2C0h	340.693		T2	C0
T2C0i	268.489		T2	C0
T2C0j	274.635		T2	C0
T2C0k	365.188		T2	C0
T2C0l	514.095		T2	C0
T2C0m	606.798		T2	C0
T2C0n	606.798		T2	C0
T2C0o	968.997		T2	C0
T2C0p	504.975		T2	C0
T3C0a	432.061		T3	C0
T3C0b	475.274		T3	C0
T3C0c	346.854		T3	C0
T3C0d	321.726		T3	C0
T3C0e	582.642		T3	C0
T3C0f	314.883		T3	C0
T3C0g	581.753		T3	C0
T3C0h	378.725		T3	C0

## Sheet: Nutr
	Reactivity(min before first opening)		Nutritive (chemical signals or particles)
N0a	5.66		N0
N0b	2		N0
N0c	2.33		N0
N0d	1.66		N0
N0e	3.66		N0
N0f	2.33		N0
N0g	3.33		N0
N0h	2.55		N0
N1a	0.66		N1
N1b	0.66		N1
N1c	1.66		N1
N1d	1		N1
N1e	3		N1
N1f	1.33		N1
N1g	1.33		N1
N1h	1.33		N1
N2a	1		N2
N2b	1.33		N2
N2c	1		N2
N2d	0.66		N2
N2e	0.66		N2
N2f	0.66		N2
N2g	0.66		N2
N2h	0.66		N2
N3a	0.33		N3
N3b	0.66		N3
N3c	0.66		N3
N3d	0.33		N3
N3e	0.33		N3
N3f	0.33		N3
N3g	0.33		N3
N3h	0.33		N3
